# Supplementary material
Source: PubMed Central journal article supplement (PMC4302027)

## SUPPLEMENTAL MATERIAL

### **SUPPLEMENTAL METHODS**

#### *Clinical characteristics*

We collected the following data in all study participants: demographics, race/ethnicity, New York Heart Association (NYHA) functional class, comorbidities, medications, vital signs, body-mass index, and laboratory data, including serum sodium, blood urea nitrogen, creatinine, hemoglobin, and BNP. Estimated glomerular filtration rate (GFR) was calculated using the Modified Diet in Renal Disease equation.

#### *Definitions of comorbidities*

Hypertension was defined by systolic blood pressure  $> 140$  mm Hg or diastolic blood pressure  $> 90$  mm Hg, physician-documented history of hypertension, or current use of antihypertensive medications. Diabetes mellitus (DM) was defined by the presence of physician-documented history of DM or the use of oral hypoglycemic agents or insulin for the treatment of hyperglycemia. Coronary artery disease (CAD) was defined by the presence of physician-documented history of CAD, known coronary stenosis  $> 50\%$ , history of myocardial infarction, percutaneous intervention, coronary artery bypass grafting, or abnormal stress test results consistent with myocardial ischemia. Obesity was defined by a body mass index  $\geq 30$  kg/m<sup>2</sup>. Chronic kidney disease was defined as an estimated glomerular filtration rate  $< 60$  ml/min/1.73 m<sup>2</sup>.

## ***Echocardiography***

All study participants underwent comprehensive 2-dimensional echocardiography with Doppler and tissue Doppler imaging (TDI) using commercially available ultrasound systems with harmonic imaging (Philips iE33 or 7500, Philips Medical Systems, Andover, MA; or Vivid 7, GE Healthcare, General Electric Corp., Waukesha, WI). Cardiac structure and function were quantified as recommended by the American Society of Echocardiography (ASE).<sup>1-3</sup>

LV end-diastolic and end-systolic volumes, and left atrial volume, were measured in the apical 4- and 2-chamber views using the biplane method of discs. LV ejection fraction was calculated as (LV end-diastolic volume – LV end-systolic volume)/LV end-diastolic volume. LV mass index was calculated using the linear method, as outlined in the ASE guidelines.<sup>1</sup> LV diastolic function was graded according to published criteria by using mitral inflow characteristics and tissue Doppler e' velocities.<sup>4</sup> Tissue Doppler e' and s' velocities were measured at the septal and lateral aspects of the mitral annulus. Sample volume size and placement were optimized for all pulse-wave Doppler and tissue Doppler measurements. All Doppler and tissue Doppler measurements were averaged over three beats (five beats for patients in atrial fibrillation).

Right heart parameters were measured on echocardiography according to published guidelines.<sup>3</sup> Specifically, we measured RV basal diameter, RV length, RV end-diastolic area, RV end-systolic area, RV wall thickness, and right atrial area. Tricuspid annular plane systolic excursion (TAPSE) was also calculated. Lastly, pulmonary artery systolic pressure was measured using the peak tricuspid regurgitation (TR) velocity (to estimate peak TR gradient) and adding that to the estimated right atrial pressure, which was based on size and collapsibility of the inferior vena cava.<sup>3</sup>

All echocardiographic measurements were made blinded to all other data by an experienced research sonographer using ProSolv 4.0 echocardiographic analysis software (FujiFilm; Indianapolis, IN) and verified by an experienced investigator with expertise in echocardiography. For the phenomapping analyses, we normalized echocardiographic variables describing chamber dimensions by regressing log-transformed echocardiographic parameters on log-transformed height and gender and using the residuals as phenotypic features.<sup>5</sup>

### *Non-invasive pressure-volume analysis*

For the estimation of LV compliance, we calculated the end-diastolic pressure-volume relationship (EDPVR) using a single-beat method<sup>6</sup> with the equation:  $LVEDP = \alpha(LVEDV)^\beta$ , where LVEDP is the LV end-diastolic pressure and LVEDV is the LV end-diastolic volume. The EDPVR represents the non-linear relationship between ventricular pressure and volume at end diastole and can be estimated non-invasively. The parameters  $\alpha$  and  $\beta$  are constants that allow point measurements of the non-linear EDPVR as reviewed elsewhere,<sup>7</sup> and were calculated for each individual based on their LVEDV and LVEDP (estimated by  $[11.96 + (\text{lateral } E/e' \text{ ratio}) * 0.596]$ ).<sup>8</sup> These parameters were then used to calculate the LVEDV at an idealized LVEDP of 20 mmHg ( $EDV_{20}$ ) for each patient.

To evaluate LV contractility, we estimated the end-systolic pressure volume relationship (ESPVR) as represented by the slope of ESPVR (end-systolic elastance [ $E_{es}$ ]).<sup>7</sup>  $E_{es}$  is a load-independent measure of LV contractility, and can be estimated using a single-beat method.<sup>9, 10</sup> The relationship between end-systolic pressure ( $P_{es}$ ) and end-systolic volume (ESV) was defined as:  $[P_{es} = E_{es}(ESV - V_0)]$ . Using  $0.9 * (\text{systolic blood pressure})$  at the time of echocardiography as

an estimate of  $P_{es}$ , we estimated  $V_0$ , the volume-axis intercept, and then generated the estimated ESV at an idealized  $P_{es}$  of 120 mmHg ( $ESV_{120}$ ) for each patient.

The effective arterial elastance ( $E_a$ ), which is a measure of systemic arterial stiffness, was estimated using the equation:  $E_a = 0.9 \cdot SBP / \text{stroke volume}$ .<sup>11</sup> Stroke volume (SV) was estimated on echocardiography using the equation:  $SV = (LV \text{ outflow tract diameter} / 2)^2 \times LV \text{ outflow tract velocity time integral}$ . V-A coupling was defined as  $E_a / E_{es}$ .<sup>7</sup>

### ***Invasive hemodynamics***

In a subset of the study cohort (N=211), right heart and pulmonary arterial (PA) catheterization was performed from either the right internal jugular or right femoral vein approach using standard Seldinger technique under fluoroscopic guidance. Participants underwent recording of invasive hemodynamics (mean RA pressure; systolic, diastolic, and mean PA pressure [mPAP]; and PCWP) using a fluid-filled, 6F PA catheter (Edwards Lifesciences, Irvine, CA) and a properly zeroed pressure transducer. Pressure recordings were analyzed off-line using a WITT Hemodynamic Workstation (Philips Medical Systems, Andover, MA) at a 50 mm/s paper speed with adjustment of pressure (mmHg) scale as needed. All hemodynamic pressure measurements were made at end-expiration and in duplicate using a standardized measurement protocol, by a physician blinded to all clinical data. Cardiac output was calculated using the thermodilution method, and PVR was calculated as the transpulmonary gradient (mPAP – PCWP) divided by cardiac output.

## REFERENCES

1. Lang RM, Bierig M, Devereux RB, Flachskampf FA, Foster E, Pellikka PA, Picard MH, Roman MJ, Seward J, Shanewise JS, Solomon SD, Spencer KT, Sutton MS, Stewart WJ. Recommendations for chamber quantification. *J Am Soc Echocardiogr.* 2005;18:1440-1463
2. Nagueh SF, Appleton CP, Gillebert TC, Marino PN, Oh JK, Smiseth OA, Waggoner AD, Flachskampf FA, Pellikka PA, Evangelista A. Recommendations for the evaluation of left ventricular diastolic function by echocardiography. *J Am Soc Echocardiogr.* 2009;22:107-133
3. Rudski LG, Lai WW, Afilalo J, Hua L, Handschumacher MD, Chandrasekaran K, Solomon SD, Louie EK, Schiller NB. Guidelines for the echocardiographic assessment of the right heart in adults. *J Am Soc Echocardiogr.* 2010;23:685-713; quiz 786-688
4. Redfield MM, Jacobsen SJ, Burnett JC, Jr., Mahoney DW, Bailey KR, Rodeheffer RJ. Burden of systolic and diastolic ventricular dysfunction in the community: appreciating the scope of the heart failure epidemic. *Jama.* 2003;289:194-202
5. Brumback LC, Kronmal R, Heckbert SR, Ni H, Hundley WG, Lima JA, Bluemke DA. Body size adjustments for left ventricular mass by cardiovascular magnetic resonance and their impact on left ventricular hypertrophy classification. *Int J Cardiovasc Imaging.* 2010;26:459-468
6. Klotz S, Hay I, Dickstein ML, Yi G-H, Wang J, Maurer MS, Kass DA, Burkhoff D. Single-beat estimation of end-diastolic pressure-volume relationship: a novel method with potential for noninvasive application. *Am J Physiol Heart Circ Physiol.* 2006;291:H403-412
7. Burkhoff D, Mirsky I, Suga H. Assessment of systolic and diastolic ventricular properties via pressure-volume analysis: a guide for clinical, translational, and basic researchers. *Am J Physiol Heart Circ Physiol.* 2005;289:H501-512
8. Ommen SR, Nishimura RA, Appleton CP, Miller FA, Oh JK, Redfield MM, Tajik AJ. Clinical utility of Doppler echocardiography and tissue Doppler imaging in the estimation of left ventricular filling pressures: A comparative simultaneous Doppler-catheterization study. *Circulation.* 2000;102:1788-1794
9. Chen CH, Fetis B, Nevo E, Rochitte CE, Chiou KR, Ding PA, Kawaguchi M, Kass DA. Noninvasive single-beat determination of left ventricular end-systolic elastance in humans. *J Am Coll Cardiol.* 2001;38:2028-2034
10. Senzaki H, Chen CH, Kass DA. Single-beat estimation of end-systolic pressure-volume relation in humans. A new method with the potential for noninvasive application. *Circulation.* 1996;94:2497-2506
11. Borlaug BA, Kass DA. Ventricular-vascular interaction in heart failure. *Heart Fail Clin.* 2008;4:23-36

## SUPPLEMENTAL TABLES

**Supplementary Table S1. Pressure-Volume Analysis Parameters Stratified by Pheno-Group**

| <b>Parameter</b>                                   | <b>Group 1<br/>(N=128)</b> | <b>Group 2<br/>(N=120)</b> | <b>Group 3<br/>(N=149)</b> | <b>P-value</b> |
|----------------------------------------------------|----------------------------|----------------------------|----------------------------|----------------|
| End-systolic elastance ( $E_{es}$ ), mmHg/ml       | 2.30±0.72                  | 2.32±0.65                  | 2.39±0.83                  | 0.57           |
| ESV <sub>120</sub> , ml                            | 37.2±15.0                  | 35.5±14.6                  | 41.1±22.6                  | 0.036          |
| Effective arterial elastance ( $E_a$ ), mmHg/ml    | 1.40±0.45                  | 1.43±0.43                  | 1.54±0.53                  | 0.041          |
| EDV <sub>20</sub> , ml                             | 83.5±24.6                  | 84.1±24.6                  | 83.8±32.6                  | 0.98           |
| Stroke work, g·m                                   | 83.0±24.5                  | 83.6±34.7                  | 70.4±30.5                  | <0.001         |
| Stroke work / end-diastolic volume ratio, g·m/ml   | 1.06±0.32                  | 1.40±0.46                  | 0.89±0.43                  | 0.001          |
| Preload-recruitable stroke work, g/cm <sup>2</sup> | 82.7±21.6                  | 75.0±28.5                  | 58.0±21.9                  | <0.001         |
| Ventricular-arterial coupling ( $E_{es}/E_a$ )     | 1.66±0.18                  | 1.65±0.19                  | 1.58±0.23                  | 0.001          |
| Pulse pressure / stroke volume ratio, mmHg/ml      | 0.62±0.24                  | 0.72±0.26                  | 0.76±0.31                  | <0.001         |

ESV<sub>120</sub> = end-systolic volume at an idealized end-systolic pressure of 120 mmHg (lower values = increased left ventricular stiffness; higher values = decreased left ventricular stiffness); EDV<sub>20</sub> = end-diastolic volume at an idealized end-diastolic pressure of 20 mmHg (lower values = reduced left ventricular diastolic compliance)

**Supplementary Table S2. Clinical and Laboratory Characteristics: Original vs. Validation Cohort**

| <b>Clinical characteristic</b>             | <b>Original cohort<br/>(N=397)</b> | <b>Validation cohort<br/>(N=107)</b> | <b>P-value</b> |
|--------------------------------------------|------------------------------------|--------------------------------------|----------------|
| Age (years)                                | 64.7±13.0                          | 65.4±12.5                            | 0.63           |
| Female, n(%)                               | 249(63)                            | 63(59)                               | 0.47           |
| Race, n(%)                                 |                                    |                                      | 0.008          |
| White                                      | 207(52)                            | 68(64)                               |                |
| Black                                      | 152(38)                            | 24(22)                               |                |
| Other                                      | 38(10)                             | 15(14)                               |                |
| NYHA functional class, n(%)                |                                    |                                      | 0.12           |
| I                                          | 49(12)                             | 8(8)                                 |                |
| II                                         | 157(40)                            | 42(40)                               |                |
| III                                        | 180(45)                            | 49(46)                               |                |
| IV                                         | 10(3)                              | 7(7)                                 |                |
| Comorbidities, n(%)                        |                                    |                                      |                |
| Coronary artery disease                    | 187(47)                            | 56(52)                               | 0.34           |
| Hypertension                               | 304(77)                            | 83(78)                               | 0.83           |
| Hyperlipidemia                             | 213(54)                            | 68(64)                               | 0.07           |
| Diabetes mellitus                          | 125(31)                            | 33(31)                               | 0.90           |
| Obesity                                    | 204(51)                            | 57(53)                               | 0.73           |
| Chronic kidney disease                     | 128(32)                            | 35(33)                               | 0.93           |
| Atrial fibrillation                        | 107(27)                            | 31(29)                               | 0.68           |
| Chronic obstructive pulmonary disease      | 145(37)                            | 22(21)                               | 0.002          |
| Obstructive sleep apnea                    | 141(36)                            | 42(39)                               | 0.48           |
| Vital signs and laboratory data            |                                    |                                      |                |
| Heart rate (bpm)                           | 70.8±13.8                          | 72.5±14.2                            | 0.27           |
| Systolic blood pressure (mmHg)             | 124.7±20.0                         | 129.4±21.0                           | 0.03           |
| Diastolic blood pressure (mmHg)            | 70.1±11.8                          | 72.8±10.1                            | 0.03           |
| Pulse pressure (mmHg)                      | 54.6±17.2                          | 56.6±18.8                            | 0.29           |
| Body mass index (kg/m <sup>2</sup> )       | 32.1±9.1                           | 33.5±10.4                            | 0.17           |
| Serum sodium (mEq/L)                       | 138.4±2.9                          | 138.2±2.8                            | 0.47           |
| Blood urea nitrogen (mg/dl)                | 24.5±16.4                          | 24.2±13.6                            | 0.90           |
| Serum creatinine (mg/dl)                   | 1.6±1.5                            | 1.6±1.4                              | 0.83           |
| Estimated GFR (ml/min/1.73m <sup>2</sup> ) | 58.3±27.4                          | 64.8±30.7                            | 0.04           |
| Fasting glucose (mg/dl)                    | 119.5±55.0                         | 117.1±43.3                           | 0.68           |
| Hemoglobin (g/dl)                          | 11.9±1.8                           | 12.3±2.3                             | 0.03           |
| B-type natriuretic peptide (pg/ml)         | 234 (86-530)                       | 171 (64-382)                         | 0.20           |
| Medications, n(%)                          |                                    |                                      |                |
| ACE-inhibitor or ARB                       | 217(55)                            | 45(44)                               | 0.05           |
| β-blocker                                  | 268(68)                            | 67(65)                               | 0.64           |
| Calcium channel blocker                    | 120(30)                            | 34(33)                               | 0.59           |
| Nitrate                                    | 57(14)                             | 14(14)                               | 0.84           |
| Loop diuretic                              | 231(58)                            | 62(60)                               | 0.71           |
| Thiazide diuretic                          | 92(23)                             | 7(7)                                 | <0.001         |
| Statin                                     | 193(49)                            | 51(50)                               | 0.87           |
| Aspirin                                    | 185(47)                            | 56(54)                               | 0.16           |

**Supplementary Table S3. Echocardiographic Characteristics: Original vs. Validation Cohort**

| <b>Parameter</b>                               | <b>Original cohort<br/>(N=397)</b> | <b>Validation cohort<br/>(N=107)</b> | <b>P-value</b> |
|------------------------------------------------|------------------------------------|--------------------------------------|----------------|
| LV end-diastolic volume, ml                    | 83.4±27.2                          | 89.0±27.6                            | 0.06           |
| LV end-systolic volume, ml                     | 33.5±15.2                          | 35.2±14.5                            | 0.29           |
| LV mass index, g/m <sup>2</sup>                | 103.7±37.7                         | 98.7±31.1                            | 0.21           |
| Left atrial volume index, ml/m <sup>2</sup>    | 34.3±14.3                          | 36.3±13.5                            | 0.18           |
| LV ejection fraction, %                        | 60.9±6.5                           | 61.6±6.1                             | 0.37           |
| Stroke volume, ml                              | 84.3±29.2                          | 79.7±23.6                            | 0.13           |
| Cardiac index, L/min/m <sup>2</sup>            | 3.1±1.2                            | 2.9±0.9                              | 0.18           |
| Pulmonary artery systolic pressure, mmHg       | 44.0±15.5                          | 48.1±18.9                            | 0.04           |
| Right atrial pressure, mmHg                    | 7.7±4.1                            | 8.2±3.9                              | 0.28           |
| E velocity, cm/s                               | 105.7±36.9                         | 109.5±39.7                           | 0.35           |
| A velocity, cm/s                               | 85.4±30.4                          | 79.0±39.3                            | 0.08           |
| E/A ratio                                      | 1.4±0.7                            | 1.7±1.0                              | <0.001         |
| Lateral e' velocity, cm/s                      | 9.3±3.9                            | 9.5±3.4                              | 0.78           |
| Septal e' velocity, cm/s                       | 7.1±2.7                            | 6.9±2.5                              | 0.50           |
| E/e' (septal)                                  | 17.0±9.3                           | 18.6±12.3                            | 0.15           |
| E/e' (lateral)                                 | 13.4±8.0                           | 13.3±8.0                             | 0.92           |
| Diastolic dysfunction grade, n (%)             |                                    |                                      | 0.23           |
| Normal diastolic function                      | 32(8)                              | 13(12)                               |                |
| Grade I (mild) diastolic dysfunction           | 43(11)                             | 7(7)                                 |                |
| Grade II (moderate) diastolic dysfunction      | 159(40)                            | 37(35)                               |                |
| Grade III (severe) diastolic dysfunction       | 137(35)                            | 45(42)                               |                |
| Indeterminate diastolic function               | 26(7)                              | 5(5)                                 |                |
| RV basal diameter, cm                          | 3.9±0.7                            | 4.1±0.8                              | 0.08           |
| RV end-diastolic area index, cm/m <sup>2</sup> | 13.9±3.8                           | 13.3±4.6                             | 0.17           |
| RV end-systolic area index, cm/m <sup>2</sup>  | 8.0±2.8                            | 8.3±3.5                              | 0.51           |
| RV wall thickness, cm                          | 0.5±0.1                            | 0.5±0.1                              | 0.008          |
| RV fractional area change                      | 0.43±0.07                          | 0.39±0.07                            | <0.001         |
| TAPSE, cm                                      | 2.0±0.6                            | 1.9±0.4                              | 0.07           |



**Supplementary Table S4. Association of Pheno-Groups with Adverse Outcomes in the Validation Cohort**

|                                                                                              | <b>Group 1</b><br>(N=37) | <b>Group 2</b><br>(N=29) | <b>Group 3</b><br>(N=41) | <b>P-value</b> |
|----------------------------------------------------------------------------------------------|--------------------------|--------------------------|--------------------------|----------------|
| <b>Outcome, n(%)</b>                                                                         |                          |                          |                          |                |
| CV hospitalization                                                                           | 7 (19)                   | 7 (24)                   | 17 (41)                  | 0.072          |
| HF hospitalization                                                                           | 3 (8)                    | 5 (17)                   | 12 (29)                  | 0.056          |
| Death                                                                                        | 0 (0)                    | 1 (3)                    | 7 (17)                   | 0.007          |
| Combined endpoint                                                                            | 7 (19)                   | 7 (24)                   | 24 (59)                  | <0.001         |
| <b>Hazard ratio (95% CI) for the composite outcome of HF or CV hospitalization, or death</b> |                          |                          |                          |                |
| Unadjusted                                                                                   | 1.0                      | 1.1 (0.4-3.1)            | 3.6 (1.6-8.4)**          | —              |
| Model 1                                                                                      | 1.0                      | 1.3 (0.4-3.6)            | 4.0 (1.5-11.0)**         | —              |
| Model 2                                                                                      | 1.0                      | 1.4 (0.5-3.8)            | 3.3 (1.1-9.5)*           | —              |

\*<0.05; \*\*≤0.01; \*\*\*≤0.001

Model 1 = Pheno-groups + BNP; Model 2 = Pheno-groups + BNP + MAGGIC risk score

The MAGGIC risk score includes the following variables: age, ejection fraction, creatinine, diabetes, chronic obstructive pulmonary disease, systolic blood pressure, body-mass index, heart rate, New York Heart Association class, ACE-inhibitor use, beta-blocker use, heart failure duration, and current smoker.

**Supplementary Table S5. Performance Characteristics of Support Vector Machine (SVM) Models in the Prediction of Binary Cardiovascular Outcomes**

| <b>Outcome</b>     | <b>Kernel</b> | <b>AUROC</b> | <b>Mean Precision</b> | <b>Mean Sensitivity</b> | <b>Mean Specificity</b> |
|--------------------|---------------|--------------|-----------------------|-------------------------|-------------------------|
| Combined           | sigmoid       | 0.759        | 0.675                 | 0.666                   | 0.591                   |
| CV hospitalization | sigmoid       | 0.723        | 0.637                 | 0.643                   | 0.579                   |
| HF hospitalization | sigmoid       | 0.704        | 0.636                 | 0.631                   | 0.572                   |
| Death              | radial        | 0.718        | 0.609                 | 0.640                   | 0.577                   |

CV=cardiovascular; HF=heart failure; AUROC = area under the receiver operator characteristic curve

## **SUPPLEMENTAL FIGURES**

### **FIGURE LEGENDS**

#### **Supplementary Figure S1.**

**Title:** Frequency of Missing Data

**Caption:** Variables with the highest percentage of missing data are those that are not present in the setting of atrial fibrillation (e.g., PR interval, tissue Doppler a' velocity, transmitral A velocity) or those that are not present or difficult to obtain in some patients on echocardiography (e.g., pulmonary artery systolic pressure, right atrial pressure, right ventricular wall thickness).

Abbreviations: BMI = body-mass index; BNP = B-type natriuretic peptide; BUN = blood urea nitrogen; DBP = diastolic blood pressure; Ea = effective arterial elastance; EDV20 = end-diastolic volume at an idealized pressure of 20 mmHg, a measure of end-diastolic elastance; Ees = end-systolic elastance; EF = ejection fraction; GFR = glomerular filtration rate; HCO<sub>3</sub> = bicarbonate; IVRT = isovolumic relaxation time; LAV = left atrial volume; LV/RV ratio = ratio of maximal left ventricular to right ventricular dimension in the apical 4-chamber view; LVEDD = left ventricular end-diastolic dimension; LVEDV = left ventricular end-diastolic volume; LVESD = left ventricular end-systolic dimension; LVESV = left ventricular end-systolic volume; LV mass = left ventricular mass; PASP = pulmonary artery systolic pressure; PP/SV = pulse pressure/stroke volume; PRSW = preload-recruitable stroke work; PWT = posterior wall thickness; RA = right atrial; RDW = red cell distribution width; RV = right ventricular; RVEDA = right ventricular end-diastolic area; RVESA = right ventricular end-systolic area; RVFAC = right ventricular fractional area change; SBP = systolic blood pressure/end-systolic volume; SWT = septal wall thickness; TAPSE = tricuspid annular plane systolic excursion; V-A = ventricular-arterial; WBC = white blood cell count.

Supplementary Figure S1. Frequency of Missing Data

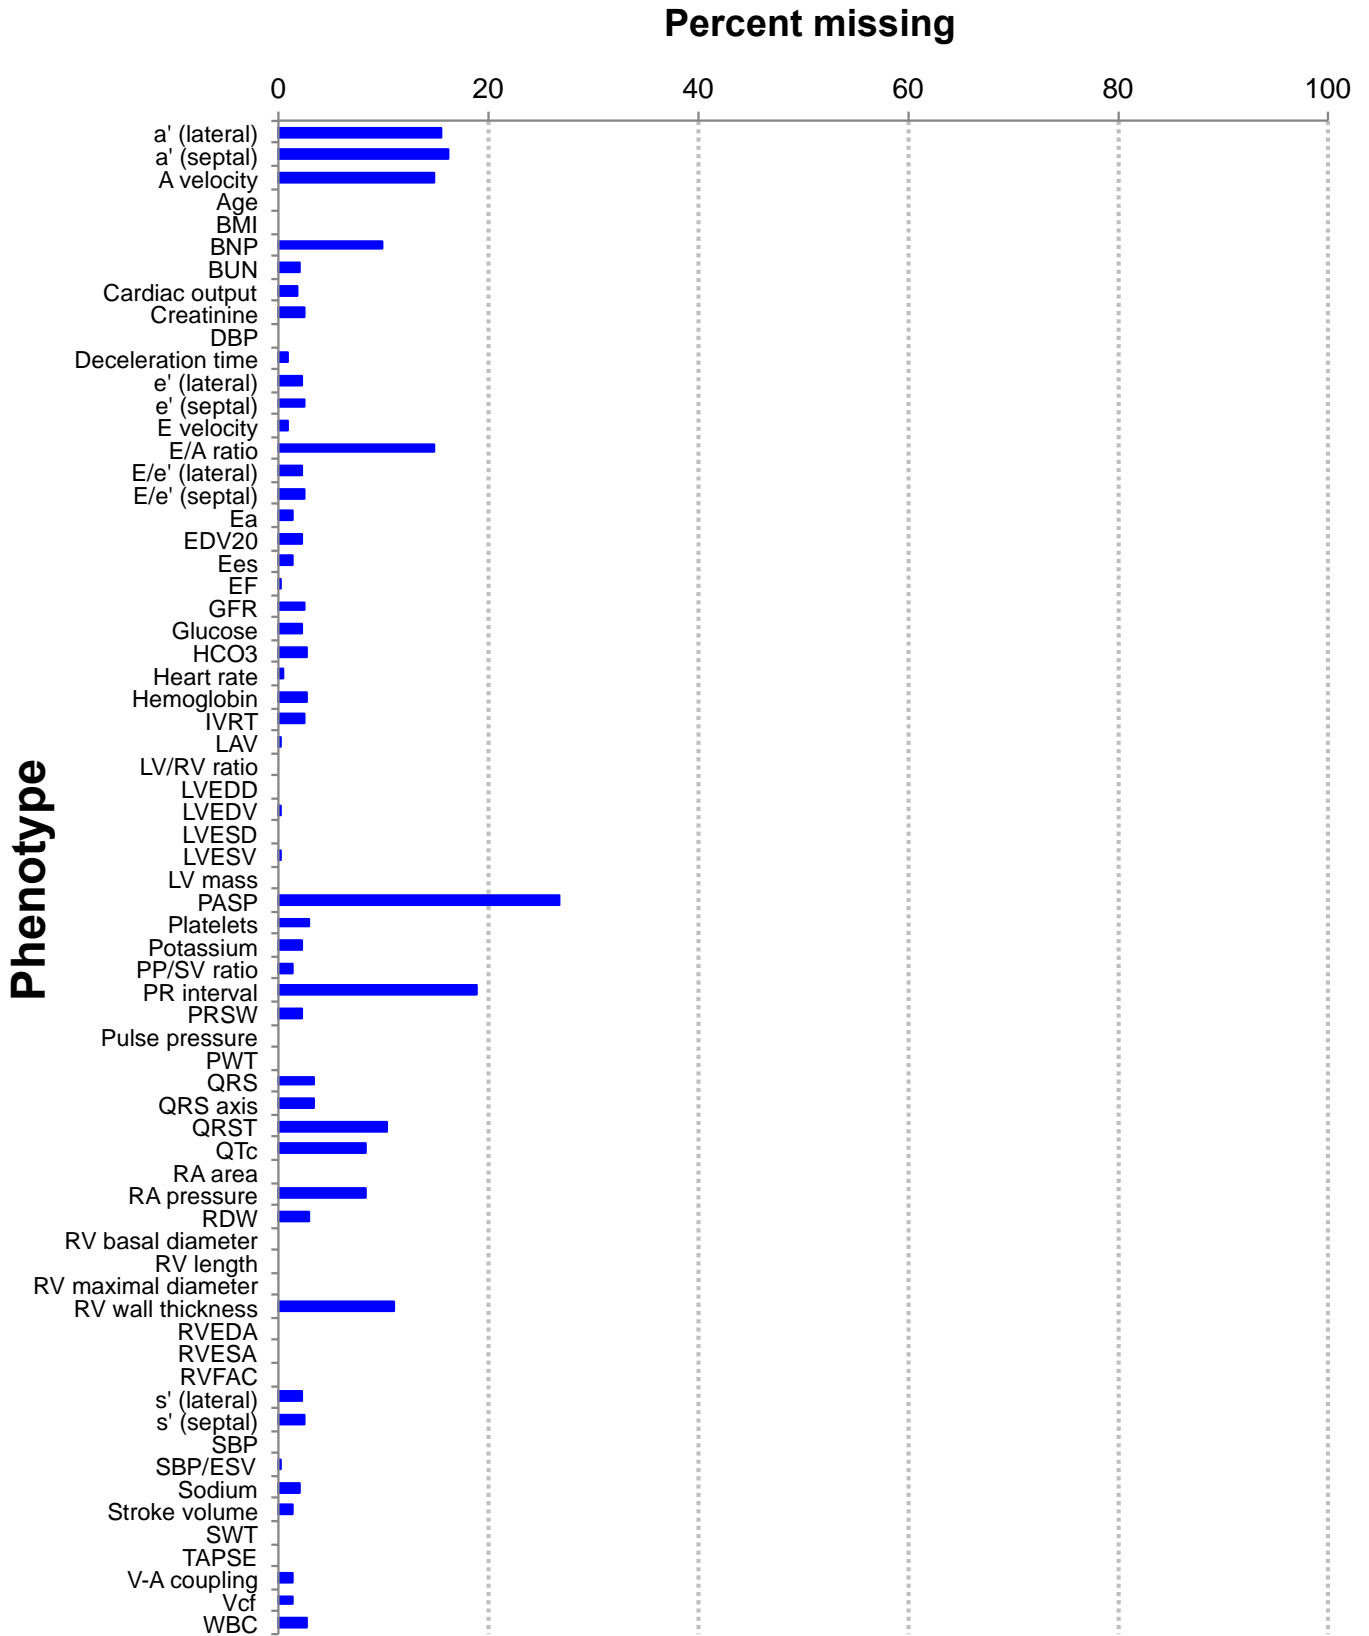

Supplement: NIHMS641414-supplement-Supplemental_Material.pdf [file NIHMS641414-supplement-Supplemental_Material.pdf]
